# Supplementary material for: Neuroprotective Effects of Albizia lebbeck (L.) Benth. Leaf Extract against Glutamate-Induced Endoplasmic Reticulum Stress and Apoptosis in Human Microglial Cells
Source: MDPI journal article supplement (doi:10.3390/ph16070989), 2023-07-10

Original Images for Blots/Gels

**Supplementary Figure S1.** Original photographs for the full-length blots at three independent experiments of each protein marker of Figure 3A.

**Figure 3A**

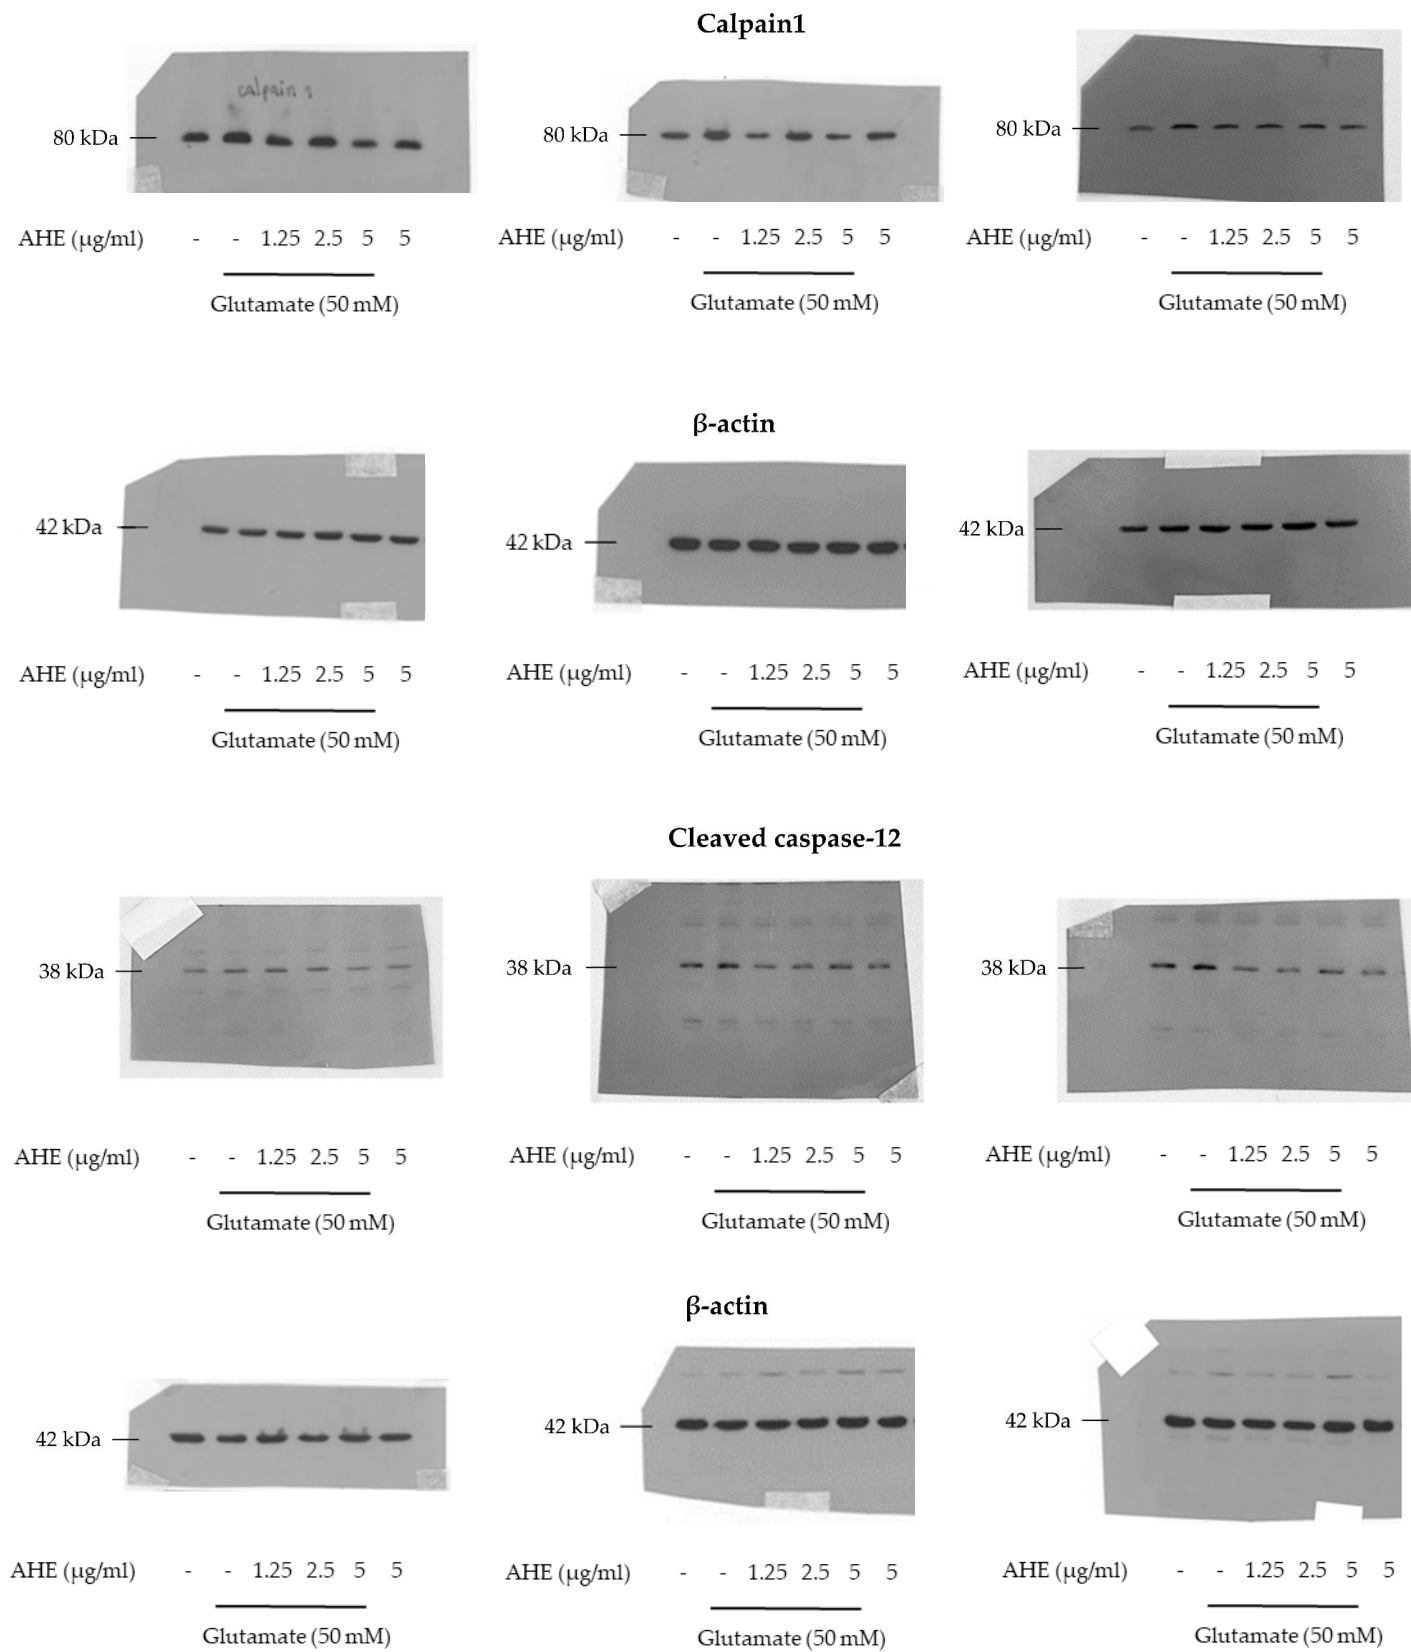

CHOP

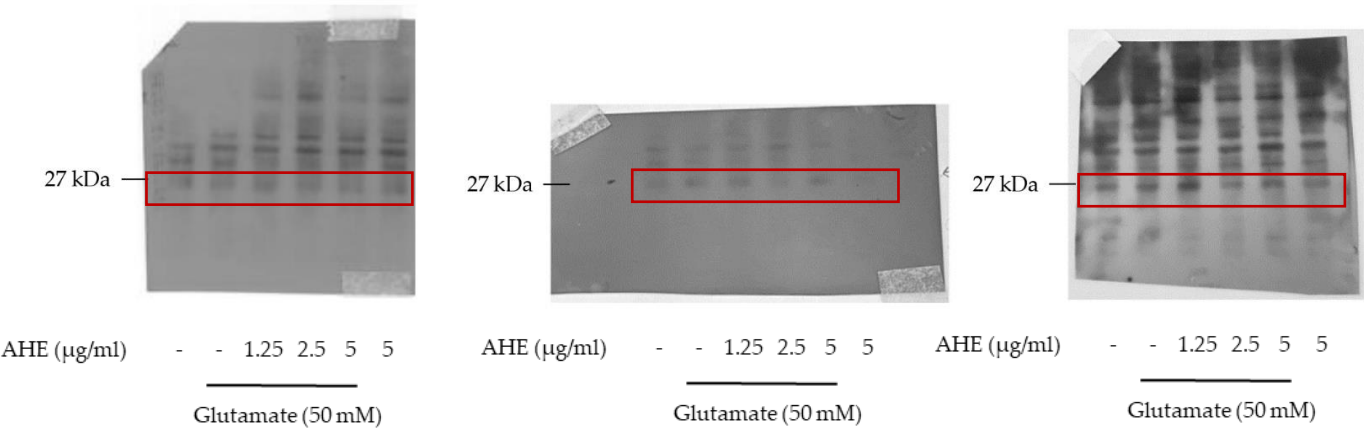

β-actin

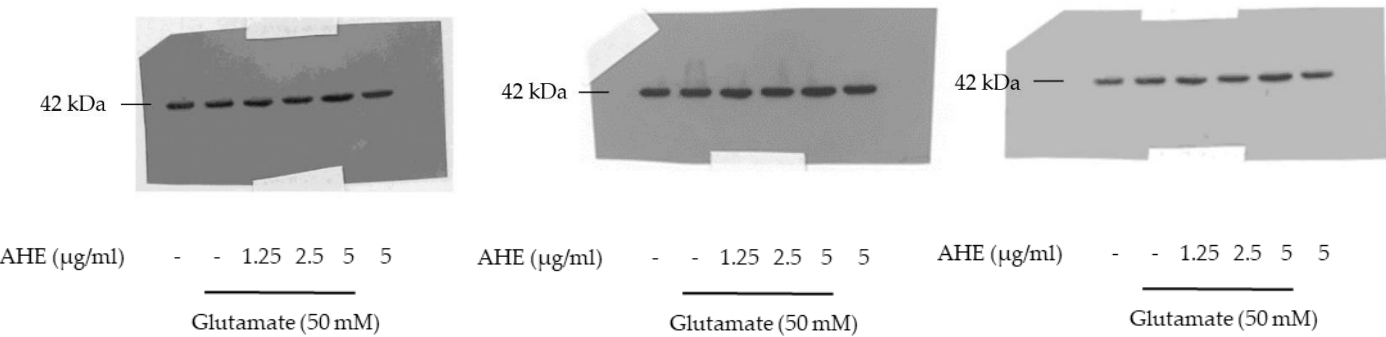

**Supplementary Figure S2.** Original photographs for the full-length blots at three independent experiments of each protein marker of Figure 4A.

**Figure 4A**

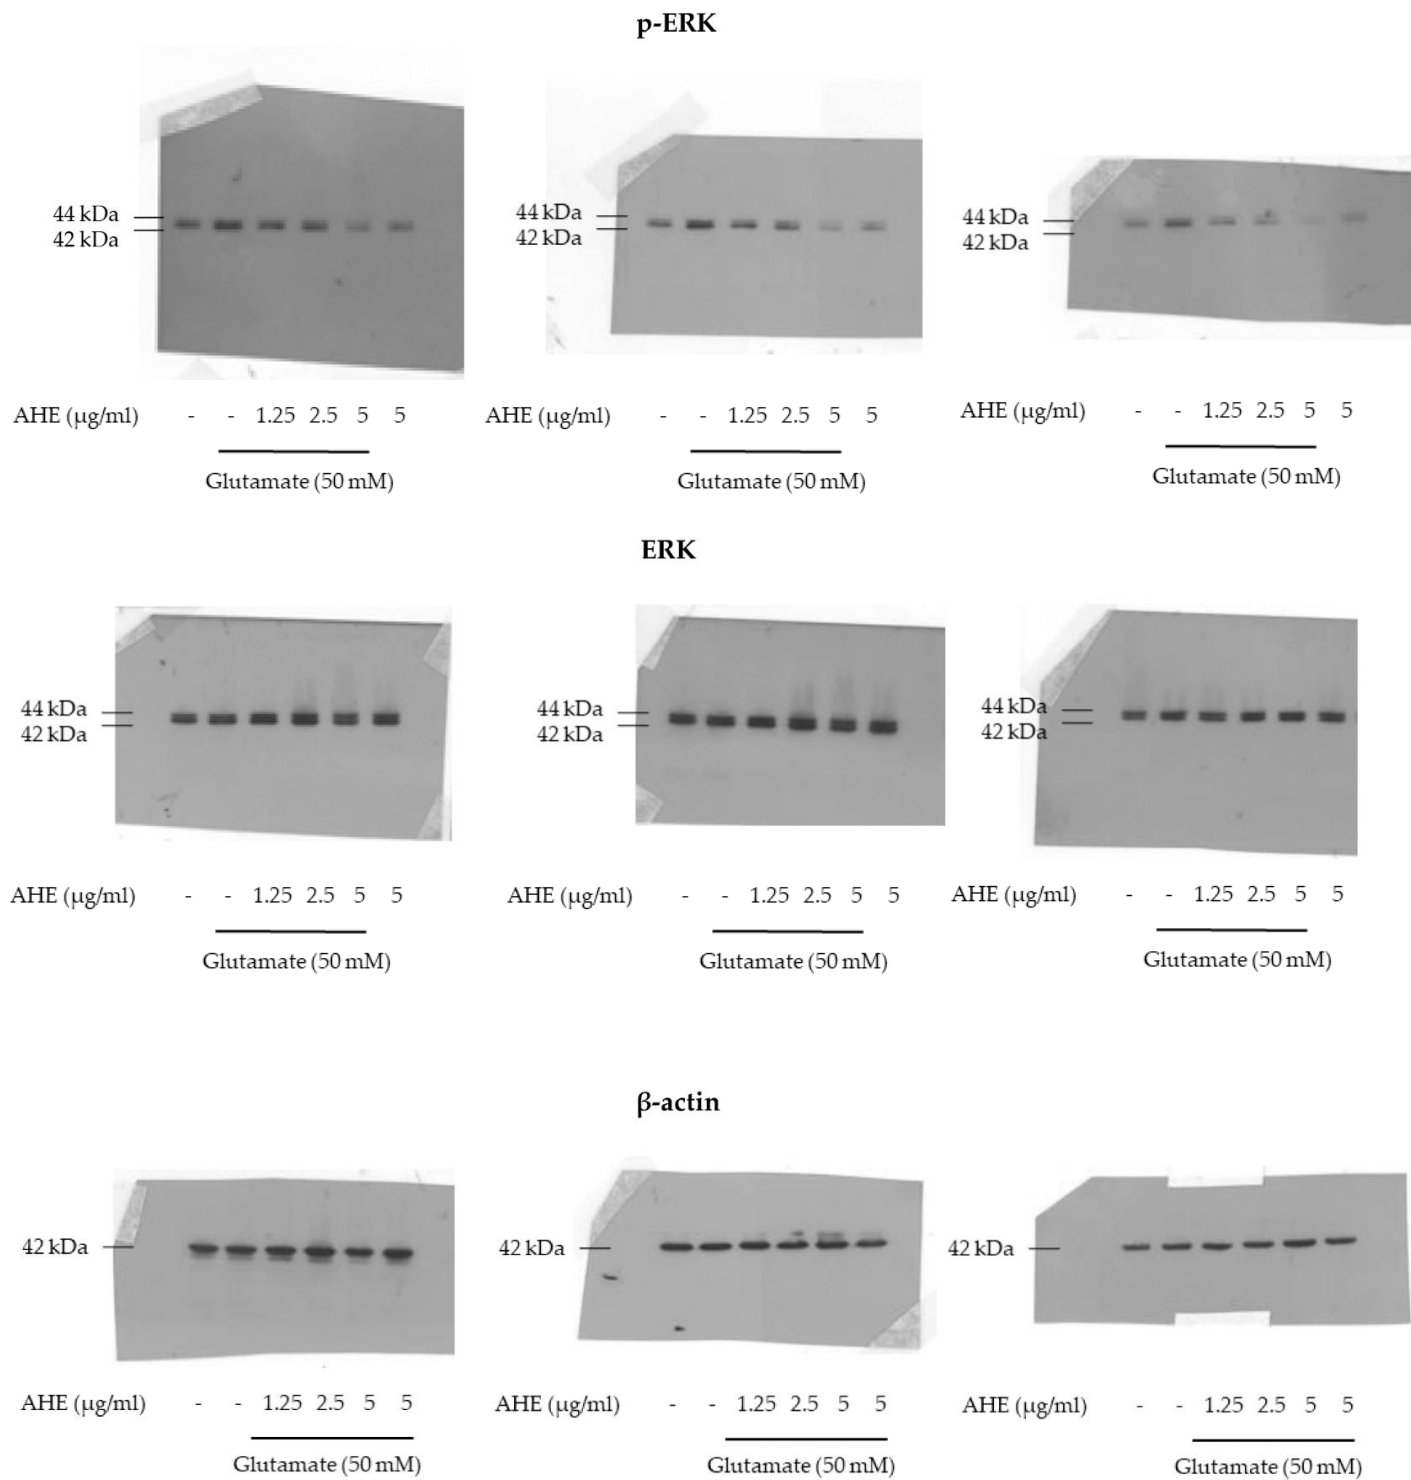

**p-p38**

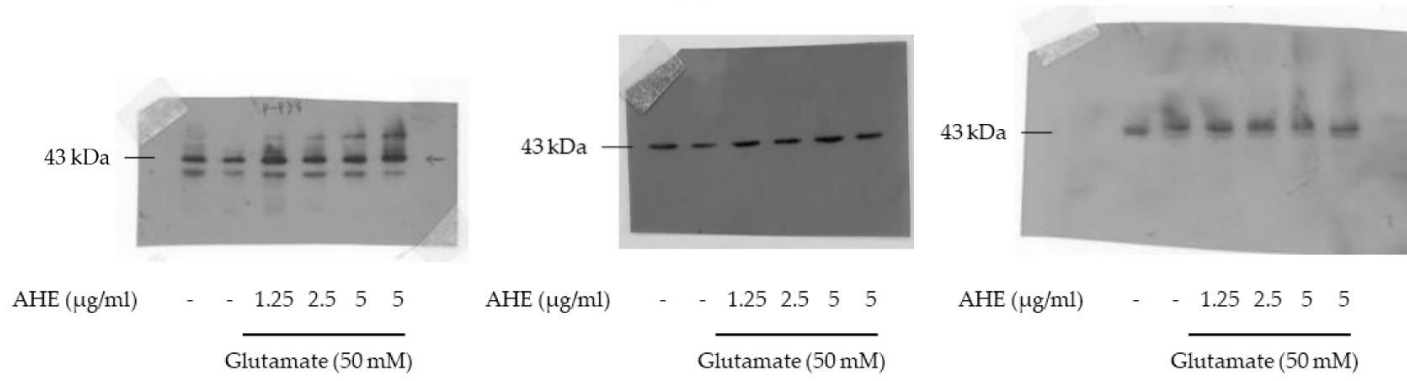

**p38**

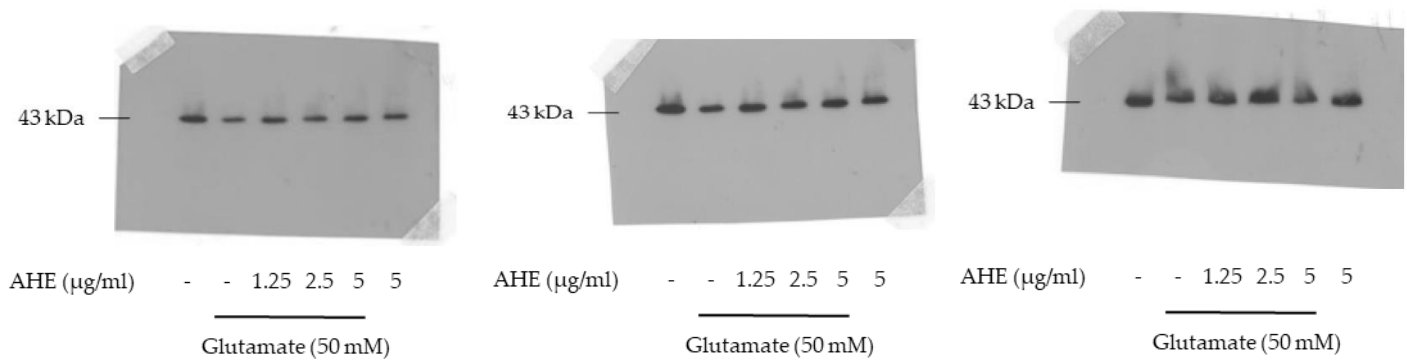

**$\beta$ -actin**

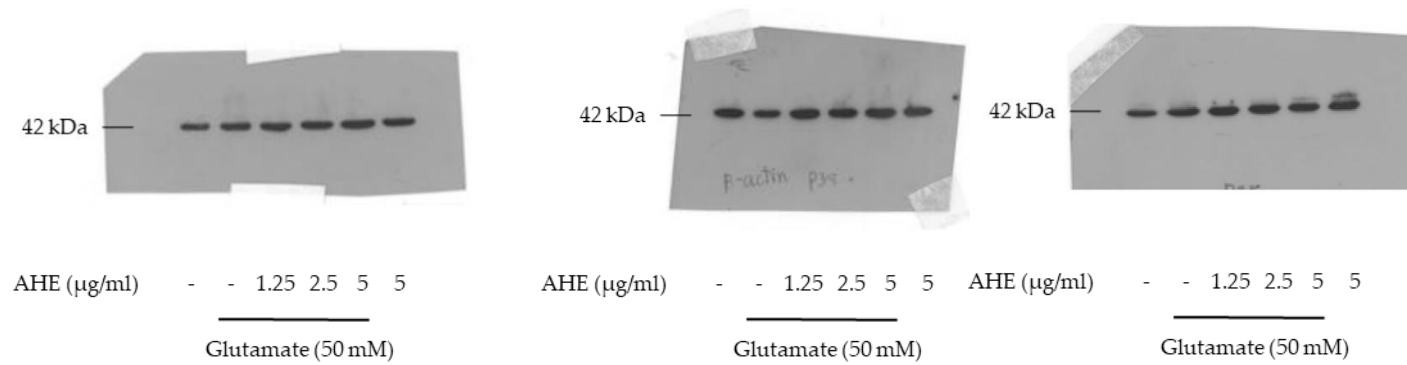

## P-JNK

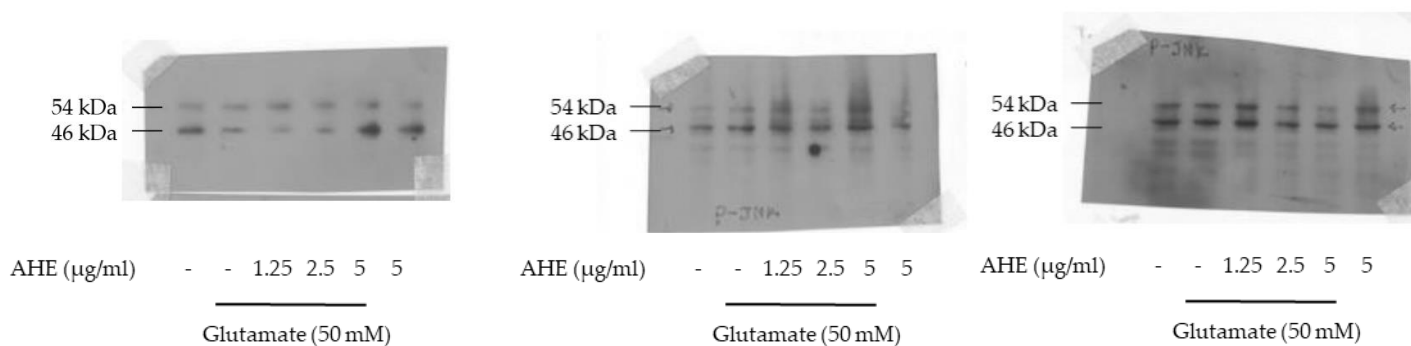

## JNK

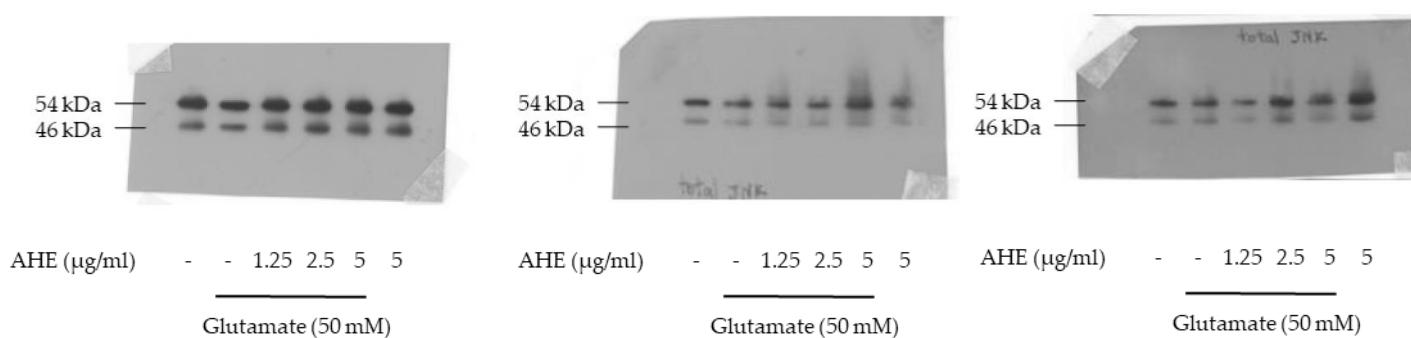

## β-actin

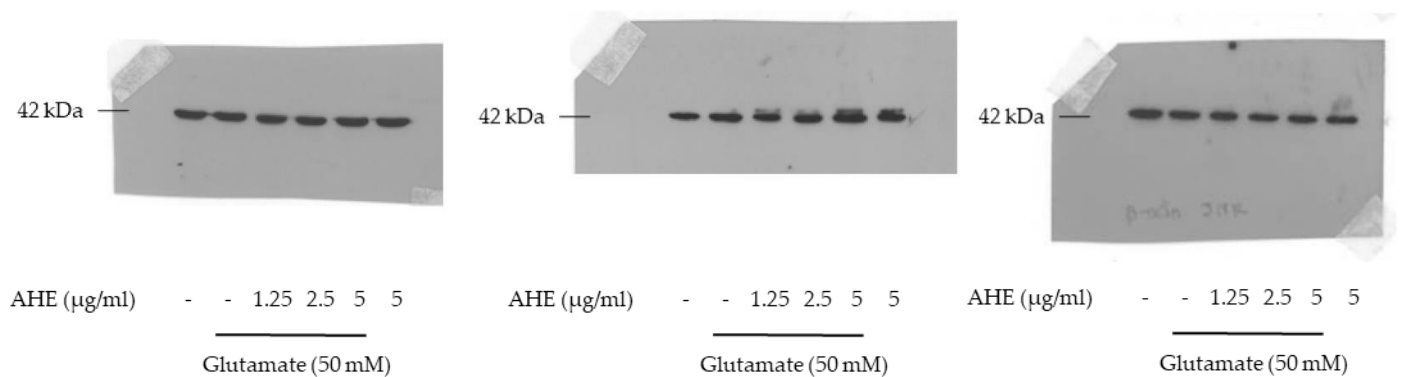

**Supplementary Figure S3.** Original photographs for the full-length blots at three independent experiments of each protein marker of Figure 5A.

**Figure 5A**

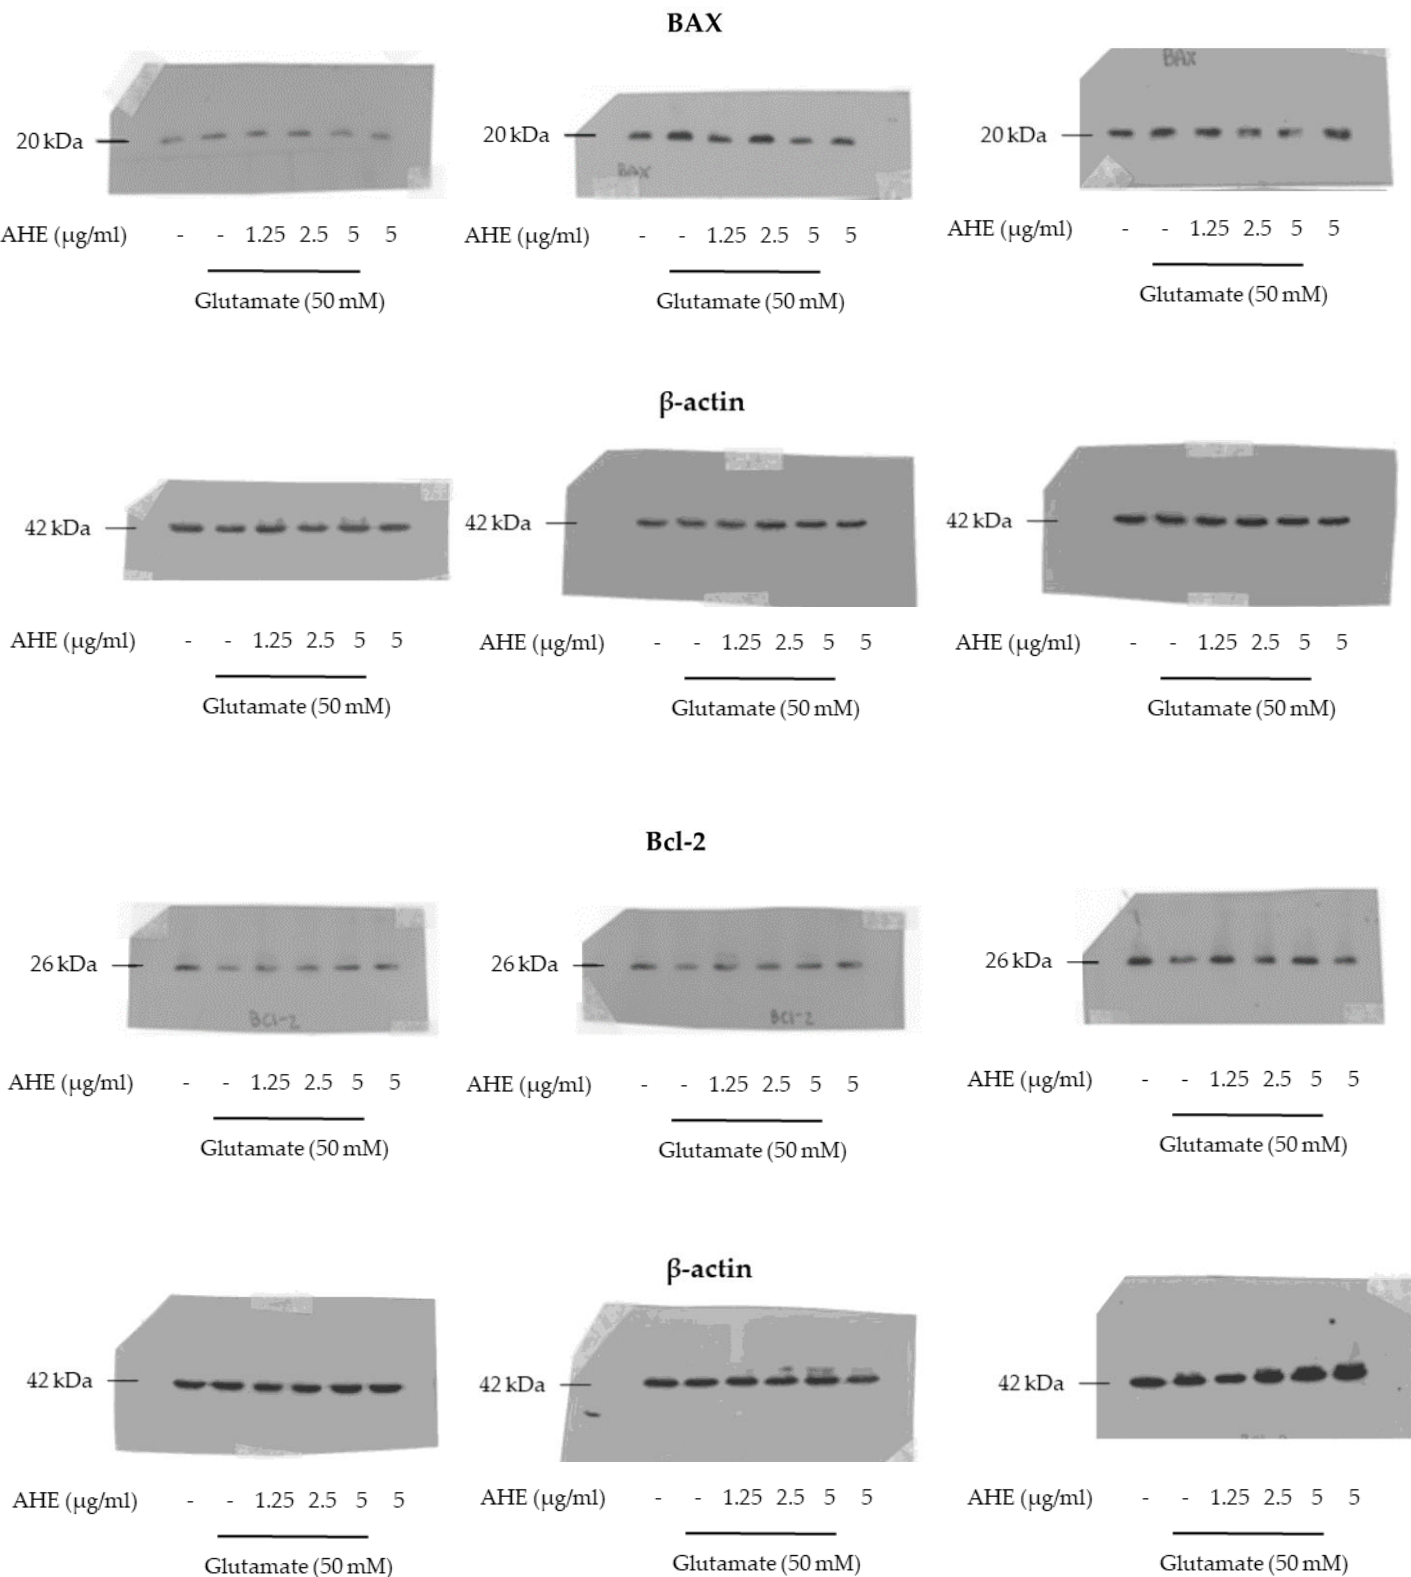

Cytochrome c

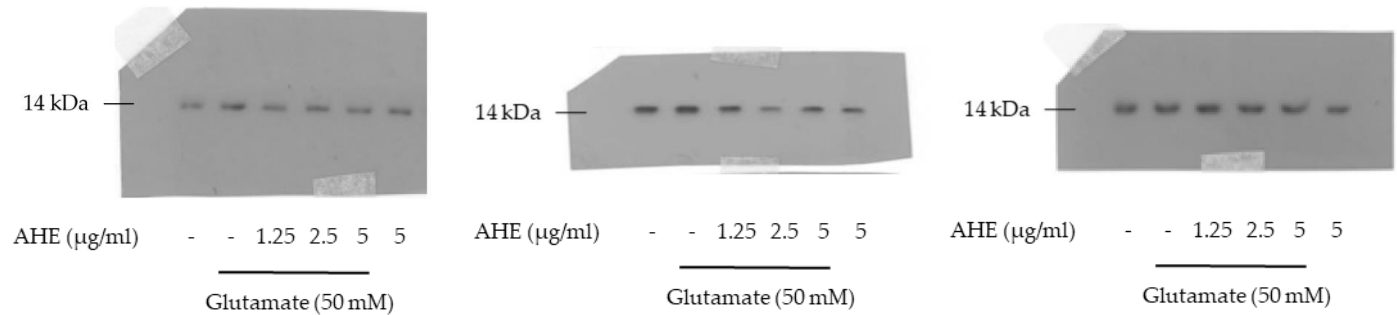

β-actin

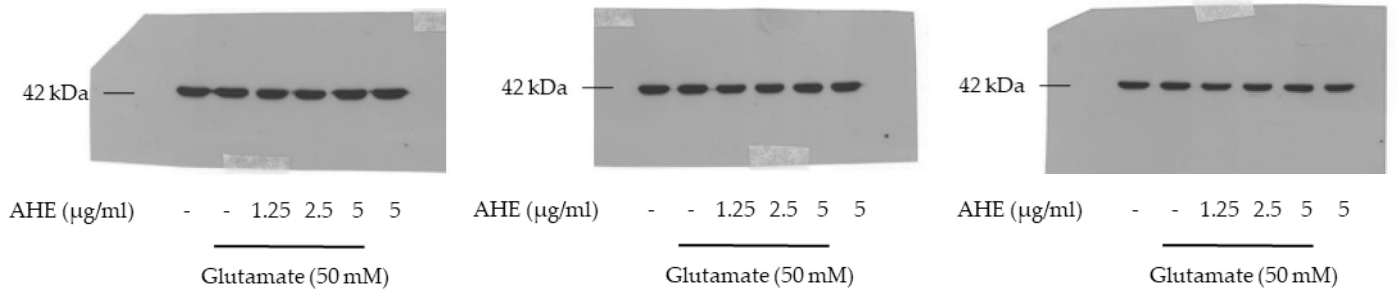

Cleaved caspase-9

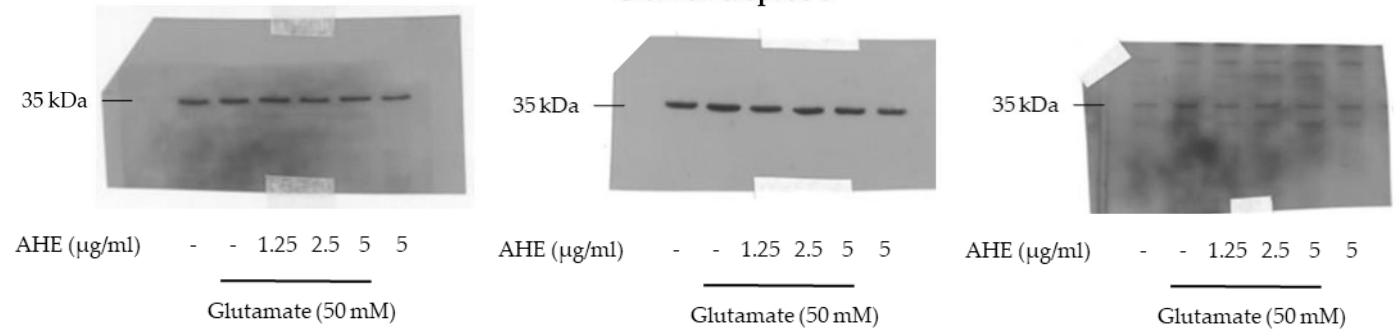

β-actin

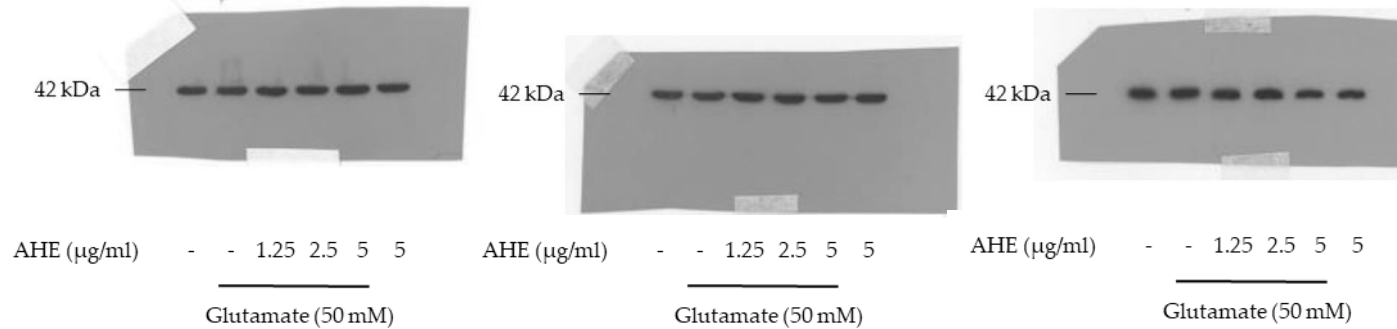

Supplement: s1 [file s1]
